# Supplementary material for: Environmental and health risks of indoor liquid crystal monomer emissions and pathways to preventive strategies
Source: Research Square preprint supplement (doi:10.21203/rs.3.rs-7762900/v1), 2025-10-17
Supplement: Supplementary file 1 [file 4a269e158716a65d66c07458.xlsx]

## Sheet: Supplementary Fig.1
Supplementary Fig.1a
The weight of male (g)	0	0.03 mg/kg d	0.3 mg/kg d	3 mg/kg d		The weight of male (g)	0	0.03 mg/kg d	0.3 mg/kg d	3 mg/kg d		T (pg/mL)	0	0.03 mg/kg d	0.3 mg/kg d	3 mg/kg d		LH (pg/mL)	0	0.03 mg/kg d	0.3 mg/kg d	3 mg/kg d		FSH (pg/mL)	0	0.03 mg/kg d	0.3 mg/kg d	3 mg/kg d
0 day	21.5	20.7	21	21.7		28 day	24.4	24	25	23.7			755.649	728.959	685.151	654.386			91.0713	78.6041	55.6022	52.07			55.83	43.95	35.45	33.53
	20.8	21.2	21.2	22.7			25.9	25	23	25.1			690.248	699.466	704.447	637.77			84.6784	83.7896	60.959	51.5194			67.56	50.12	37.32	39.85
	21.2	21.3	21.3	22.1			25.8	23.4	23.5	25			740.736	681.428	728.101	680.668			75.3437	77.1392	66.9543	65.2005			60.67	44.81	29.35	37.43
	22	21.2	22.9	21.2			24.9	24.9	24.9	24.2			760.932	723.097	678.598	659.856
	21.8	22.1	22	21.3			25.1	24.5	25.3	22.8
	22.1	21.9	22.2	22.2			24.9	24.6	24.2	24
	21.9	21.7	21.9	21.2			24.2	23.7	26.1	23.7
Supplementary Fig.1b
The weight of female (g)	0	0.03 mg/kg d	0.3 mg/kg d	3 mg/kg d		The weight of male (g)	0	0.03 mg/kg d	0.3 mg/kg d	3 mg/kg d		E2 (pg/mL)	0	0.03 mg/kg d	0.3 mg/kg d	3 mg/kg d		LH (pg/mL)	0	0.03 mg/kg d	0.3 mg/kg d	3 mg/kg d		FSH (pg/mL)	0	0.03 mg/kg d	0.3 mg/kg d	3 mg/kg d
0 day	17.4	17.3	17.9	17.7		28 day	19.1	21.3	21.5	20.6			45.7492	40.5135	21.7956	24.367			69.727	85.9482	69.2168	34.2776			35.24	35.77	35.79	27.58
	16.4	17.2	17.2	17.2			22.7	21.2	20.7	21.1			52.0934	44.1655	31.0424	31.4154			78.3075	66.3491	58.7776	34.4747			45.54	40.24	27.86	25.65
	17.7	17.1	17.3	17.5			24.1	22.1	21	19.8			39.0337	45.3013	34.5297	31.0669			89.2991	60.2028	48.1196	56.964			34.86	27.46	30.44	20.66
	17.7	16.8	17.8	17.4			20.7	21.3	19.3	20.3			55.4681	30.0515	38.4955	25.6463
	17.1	17.4	17.3	16.8			21.3	21.6	19.9	20.1
	17.2	17.6	17.8	17.7			21.9	19.8	19.5	19.8
	17.7	17.8	17.5	16.5			21.3	20.3	21.2	19.6
	17.1	17.5	17.1	17.1			19.4	21	20.6	19.5
	17.1	17.3	16.7	17.4			19.2	20.9	19	19.7
	17.4	17.4	17.8	17.3			19.7	20.3	19.3	19.4
	17.5	16.9	17.4	17.5			21.6	18.9	19.7	19.4
	17.5	17.4	18.1	18.4			21	19.2	19.7	20.7
	17.4	17.6	17	16.8			20.5	19.3	19.4	19.1
	17.6	17.2	17.1	17			19.6	19.7	20.2	19.1
		17.1						20.7
		17.6						20.5
		17.3						19.7
		17.5						19.3
		17.8						20.9

## Sheet: Supplementary Fig.2
Supplementary Fig.2b
Number of sperm	0	0.03 mg/kg d	0.3 mg/kg d	3 mg/kg d		Immotile sperm ratio (%)	0	0.03 mg/kg d	0.3 mg/kg d	3 mg/kg d		VCL (μm/s)	0	0.03 mg/kg d	0.3 mg/kg d	3 mg/kg d		VSL (μm/s)	0	0.03 mg/kg d	0.3 mg/kg d	3 mg/kg d		ALH (μm)	0	0.03 mg/kg d	0.3 mg/kg d	3 mg/kg d		LIN (%)	0	0.03 mg/kg d	0.3 mg/kg d	3 mg/kg d
	200	130	169	155			11.11	16.15	38.78	23.26			143.64	136.42	86.81	95			35.74	51.93	44.84	28.15			1.89	2.14	2.01	1.94			31.55	35.35	31.78	29.63
	184	116	141	129			16.22	18.1	33.33	26.89			159.36	125.87	92.76	85.28			41	46.24	43.13	29.31			1.91	1.84	1.97	2.1			34.54	36.71	30.56	34.37
	195	107	146	119			28.79	22.43	25.93	31.78			155.56	131.14	80.54	95.54			41.52	52.86	38.3	31.23			1.94	1.92	1.97	2.04			32.36	27.02	30.58	32.69
	179	100	160	129			18.24	33	22.92	16.18			154.03	101.77	141.1	81.65			36.09	60.11	42.51	24.11			1.89	1.91	2.13	1.93			31.64	29.34	31.53	29.53
	201	104	173	162			16.91	39.42	31.91	19.84			120.33	129.75	141.15	77.34			35.77	29.03	36.88	26.79			2	1.83	2.21	2.11			33.21	28.83	31.17	34.64
	180	114	105	136			7.02	26.32	29.23	19.08			134.7	122.79	125.25	78.14			33.01	36.87	35.5	17.65			2.11	1.9	2.19	1.69			32.59	26.56	32.32	22.59
	111	84	106	162			13.72	15.48	38.78	16.06			137.36	143.55	121.3	115.64			34.7	35.21	32.84	28.55			1.94	2.1	2	1.76			31.74	28.54	29.95	24.69
	132	150	98	126			17.88	20	24.07	21.19			158.43	110.89	98.39	99.38			37.88	31.87	28.35	27.79			2.03	2.08	1.99	1.88			30.75	34.15	32.3	27.96
	148	122	96	152			18.15	22.95	29.5	17.02			143.68	127.61	96.04	98.77			45.61	43.1	24.14	29.82			2.01	2.16	2.03	1.95			32.97	33.6	26.74	30.19
	136	122	85	140			13.93	22.86	28.63	18.58			152.94	141.19	104.14	133.86			47.03	49.63	27.87	34.55			2.06	2.11	1.95	2.04			30.92	36.06	30.66	32.59
		131		163			7.85	31.51	34.98	17.86			128.85	129.39	90.94	129.47			42.48	42.61	29.16	38.71			2.04	2.12	2.03	1.83			31.77	34.56	30	26.69
		115		134			19.79	12.68	30.88	31.25			135.18	120.43	93.05	132.62			41.8	51.26	21.54	32.52			2.01	2.01	1.83	1.8			30.42	34.76	29.59	25.82
		196		137			18.12	15.33	18.39	18.9			120.05	108.02	90.29	117.95			46.03	43.16	22.71	32.38			1.97	2.07	1.97	1.8			30.95	35.42	26.6	25.91
		137		125			10.9	15.57	25.78	31.94			114.07	120.27		111.75			38.23	51.47	22.24	29.84			2.05	2.02	1.95	1.92			30.73	31.66	31.09	29.19
		119		118			11.27	12.3	29.22	36.07			123.8	136.65		102.23			37.64	38.32	26.99	32.16			1.98	2.2	1.93	1.99			30.07	33.55	33.74	31.32
		129		141			29	11.45	20.8	28.21			144.33	128.47		112.07			41.78	44.36	25.37	36.44			2.01	1.99	1.83	1.86			30.08	31.91	34.87	27.57
		133		111			18.83	15.65	25.23	25.76			131.62	142.74		125.46			49.03	50.01	30.03	33.72			1.87		1.99	1.91			30.83	36.42	30.08	28.98
		228		139			13.25	22.73	11.43	26.06				107.42		117.9			52.82	40.97	33.87	33.02			1.96		2.45	1.92			30.61	34.57	31.99	29.19
		117		113			27.72	21.31	12.26	24.76				125.65		116.54			47.53	43.76	29.23				1.98		2.28	1.9			32.38	31.15	27.59	28.7
		112		84			28.72	25	24.49	24.29				122.11					55.28	43.53	24.71				1.97		2.18	1.91			30.63	36.52	31.35	29.05
		183		96			26.79	21.74	23.96					120					46.77	46.28	23.44				1.95		2.37	1.88				35.68	27.09	28.04
		125		127			29.09	20.51	35.29					139.29					49.79	56.09	26.53				1.95		2.18	1.88					27.41	28.15
		93		72			21.43	13.51	30.77					134.63					52.58	44.72	21.07				1.98		2.08	1.9					30.49	28.6
				61			29.17	14.8						130.81					54.26	38.33	22.17				1.97		2.25	1.89					26.12	28.33
				56				18.25						143.52					41.23	49.62	21.25				2.03		2.12	1.99						31.09
				117				23.53						142.56					55	48.05	21.06				1.97		1.95
				165				19.38											50.91	39.21							2.02
								14.29												47.89							1.86
								7.02												38.38							2
								19.66												33.45							1.85
								17.86												36.31							1.86
								10.38																			1.96
								13.6																			1.81
								13.98

## Sheet: Supplementary Fig.4
Supplementary Fig.4e
Epididymal tube wall thickness (μm)	0	0.03 mg/kg d	0.3 mg/kg d	3 mg/kg d
	34.3	28.6	9.8	20.8
	15.1	18.2	20.6	8.4
	29.2	33	11.6	11.5
	10.5	28.4	14.4	10.1
	27.2	12.1	17.7	12
	30.3	18.7	23.9	18.3
	31.9	15.9	25.6	24.2
	32.7	18.3	9.5	6.3
	30.1	22.3	16.4	21.8
	26.3	27.5	14.4	19.8
	15.2	31.6	13.8	13.2
	18	18.8	13.1	15.6
	12.5	12	24.9	20.4
	21	24.3	16.9	10
	18.6	14.8	32	13.7
	19.8	15.6	15.5	14.8
	16.1	25.6	23.2	11.9
	24	16.7	23.7	9.9

## Sheet: Supplementary Fig.5
Supplementary Fig.5b
Total number of follicle	0	0.03 mg/kg d	0.3 mg/kg d	3 mg/kg d
	11	10	10	9
	13	13	11	10
	13	15	8	8
	12	9	10	4
Supplementary Fig.5c
Thickness of uterine luminal epithelium (μm)	0	0.03 mg/kg d	0.3 mg/kg d	3 mg/kg d
	39.9	23	23.2	26.8
	23.7	16.7	26	14.5
	26.5	22	18.1	22.1
	29.8	19.1	19.4	21.8
	27.8	31.3	21	18.9
	25.5	34	21.7	27.1
	20.7	28.1	16.5	21.1
	26.6	24.3	24.8	16.5
	26.8	28.3	30.7	12
	23.7	24.6	30.3	14.4
	34.6	33.8	15.9	18.1
	28.7	33.4	17.6	19.1
	27.8	25.3	22.7	22.2
	23.6		23.2	16.3
	22.5		21.5	11.4
Supplementary Fig.5d
Endometrial glands number /mm2	0	0.03 mg/kg d	0.3 mg/kg d	3 mg/kg d
	105.43	67.38	66.93	30.28
	90.44	59.07	65.59	40.44
	113.95	90.25	49.66	52.26

## Sheet: Supplementary Fig.6
Supplementary Fig.6a
Infertility rate (%)	0	0.03 mg/kg d	0.3 mg/kg d	3 mg/kg d
	0	40	30	50
Supplementary Fig.6b
Number of offspring	0	0.03 mg/kg d	0.3 mg/kg d	3 mg/kg d
	9	7	3	0
	7	8	4	7
	7	7	0	3
	7	8	8	0
	7	0	5	8
	8	0	0	0
	6	0	8	7
	6	6	8	0
	7	7	4	0
		5	7	8
Supplementary Fig.6c
Offspring mortality rate (%)	0	0.03 mg/kg d	0.3 mg/kg d	3 mg/kg d
	0	0	0	0.285714
	0	0	1	1
	0	0	0	0
	0	0	1	0.142857
	0	0	0	0.25
	0	1	0
	0	0.2	0
	0		0
	0
Supplementary Fig.6d
T (pg/mL)	0	0.03 mg/kg d	0.3 mg/kg d	3 mg/kg d
	221.96	250.12	190.84	71.46
	199.45	200.65	176.45	135.45
	150.65	190.45	140.51	99.45
Supplementary Fig.6e
E2 (pg/mL)	0	0.03 mg/kg d	0.3 mg/kg d	3 mg/kg d
	1590.86	1352.45	1102.41	998.02
	1409.65	1400.52	1150.35	950.52
	1576.51	1581.51	995.43	1110.62
Supplementary Fig.6f Male offspring
LH (pg/mL)	0	0.03 mg/kg d	0.3 mg/kg d	3 mg/kg d		FSH (ng/mL)	0	0.03 mg/kg d	0.3 mg/kg d	3 mg/kg d
	4735.45	5185.29	6612.45	10000.5			155.58	117.57	102.28	100.65
	5000.43	5208.45	6204.47	11065.6			175.45	125.43	125.45	110.15
	4395.48	6000.45	7908.45	11198.8			155.47	133.45	110.25	105.45
Supplementary Fig.6g Female offspring
LH (pg/mL)	0	0.03 mg/kg d	0.3 mg/kg d	3 mg/kg d		FSH (ng/mL)	0	0.03 mg/kg d	0.3 mg/kg d	3 mg/kg d
	18505.7	18237.7	16686.9	17005.5			207.74	196.1	190.9	188.45
	18000.3	18504.4	16805.5	17500.6			190.54	211.45	219.42	180.45
	18600.2	17935.5	17510.5	16052.4			211.46	199.15	185.15	179.53
