# Supplementary material for: Environmental and health risks of indoor liquid crystal monomer emissions and pathways to preventive strategies
Source: Research Square preprint supplement (doi:10.21203/rs.3.rs-7762900/v1), 2025-10-17
Supplement: Supplementary file 2 [file c89ea5cabd3bd2d0c4aeb260.docx]

Supplementary information for:

Environmental and health risks of indoor liquid crystal monomer emissions and pathways to preventive strategies

Shan Hea, Junjie Wanga, Yuhe Heb, Kenneth M. Y. Leungc, Jia Hed*, Fengchang Wua*

a State Key Laboratory of Environmental Criteria and Risk Assessment, Chinese Research Academy of Environmental Sciences, Beijing 100012, China.

b School of Energy and Environment and State Key Laboratory of Marine Environmental Health, City University of Hong Kong, Hong Kong, China.

c State Key Laboratory of Marine Environmental Health and Department of Chemistry, City University of Hong Kong, Hong Kong, China.

d Beijing Key Laboratory of Urban Hydrological Cycle and Sponge City Technology, College of Water Sciences, Beijing Normal University, Beijing 100875, China.

**Supplementary Item List**

**Supplementary Table 1:** Reported measured dust concentration data of LCM.

**Supplementary Table 2:** Estimated EDI and HQ of measured dust concentrations.

**Supplementary Table 3:** Liquid crystal panel area of common electronic devices.

**Supplementary Table 4:** Parameters for simulated living scenarios.

**Supplementary Table 5:** HQ in different life scenarios.

**Supplementary Table 6:** RfD values for LCM determined using the benchmark dose approach.

**Supplementary Note 1:** Determination the critical indicators of environmental and health risks.

**Supplementary Note 2:** Supplementary methods.

**Supplementary Table 1:** Reported measured dust concentration data of LCM.

| Sample location | Number of samples | Min (ng/g) | Max (ng/g) | Mean (ng/g) | Reference |
| --- | --- | --- | --- | --- | --- |
| Residential indoor dust from the United States | 104 | 15.4 | 41.44 | 23.01 | 1 |
| New Jersey | 3 | - | - | 18.2 | 1 |
| New York | 56 | - | - | 24.9 | 1 |
| Georgia | 1 | - | - | 22.3 | 1 |
| Residential indoor dust from the United States | 10 | 5.96 | 36.4 | 15.80 | 2 |
| Residential indoor dust from Beijing, China | 112 | ND | 1.16 | 0.17 | 3 |
| Residential indoor dust from Beijing, China | 93 | ND | 2.56 | 0.35 | 4 |
| Residential outdoor dust from China | 97 | ND | 106 | 7.02 | 5 |
| E-waste recycling industrial park workshop indoor dust from Central China | 76 | 528 | 12400 | 1660.00 | 6 |
| E-waste recycling industrial park outdoor dust from Central China | 33 | 680 | 2020 | 1280.00 | 6 |
| E-waste recycling facility with LCD dismantling in Yichun City, China | 31 | 9.92 | 4130 | 354.00 | 7 |
| E-waste recycling facility with non-LCD e-waste dismantling in Yichun City, China | 31 | ND | 90 | 39.10 | 7 |

ND: not detected

**Supplementary Table 2:** Estimated EDI and HQ of measured dust concentrations.

|  | EDI (ng/kg d) | | | | | | HQ | | | | | |
| --- | --- | --- | --- | --- | --- | --- | --- | --- | --- | --- | --- | --- |
|  | Children | | | Adult | | | Children | | | Adult | | |
| Sample location | min | max | mean | min | max | mean | min | max | mean | min | max | mean |
| Residential Indoor Dust from the United States | 0.46 | 1.23 | 0.69 | 0.04 | 0.1 | 0.05 | 0.15 | 0.41 | 0.23 | 0.012 | 0.032 | 0.018 |
| New Jersey | - | - | 0.54 | - | - | 0.04 | - | - | 0.18 | - | - | 0.014 |
| New York | - | - | 0.74 | - | - | 0.06 | - | - | 0.25 | - | - | 0.019 |
| Georgia | - | - | 0.66 | - | - | 0.05 | - | - | 0.22 | - | - | 0.017 |
| Residential Indoor Dust from the United States | 0.18 | 1.08 | 0.47 | 0.01 | 0.08 | 0.04 | 0.059 | 0.36 | 0.16 | 0.005 | 0.028 | 0.012 |
| Residential Indoor Dust from Beijing, China | - | 0.03 | 0.01 | - | 0.003 | 0.0004 | - | 0.012 | 0.0017 | - | 0.0009 | 0.00013 |
| Residential Indoor Dust from Beijing, China | - | 0.08 | 0.01 | - | 0.006 | 0.0008 | - | 0.025 | 0.0035 | - | 0.002 | 0.00027 |
| Residential outdoor dust from China | - | 3.16 | 0.21 | - | 0.24 | 0.02 | - | 1.05 | 0.07 | - | 0.081 | 0.0054 |
| E-waste recycling industrial park workshop indoor dust from Central China | 15.73 | 369.42 | 49.45 | 1.21 | 28.52 | 3.82 | 5.24 | 123.14 | 16.48 | 0.40 | 9.51 | 1.27 |
| E-waste recycling industrial park outdoor dust from Central China | 20.26 | 60.18 | 38.13 | 1.56 | 4.65 | 2.94 | 6.75 | 20.06 | 12.71 | 0.52 | 1.55 | 0.98 |
| E-waste recycling facility with LCD dismantling in Yichun City, China | 0.29 | 123.04 | 10.55 | 0.03 | 9.5 | 0.81 | 0.098 | 41.01 | 3.52 | 0.008 | 3.17 | 0.27 |
| E-waste recycling facility with non-LCD e-waste dismantling in Yichun City, China | - | 2.68 | 1.16 | - | 0.21 | 0.09 | - | 0.89 | 0.39 | - | 0.069 | 0.03 |

**Supplementary Table 3:** Liquid crystal panel area of common electronic devices.

| Device | LCD panel area |
| --- | --- |
| 65-inch LCD TV | 10573.5 cm2 |
| 15-inch laptop | 652.5 cm2 |
| Mobile phone | 90 cm2 |
| 8-inch tablet | 245.9 cm2 |
| 24-inch computer monitor | 1561.7 cm2 |
| 55-inch display | 8295.7 cm2 |
| 75-inch display | 15495.0 cm2 |
| 100-inch display | 27066.4 cm2 |
| traditional classrooms | 65 m2 classroom with 55-inch display |
| multimedia classrooms | 55 m2 classroom with 75-inch display |
| multifunctional smart classrooms | 90 m2 classroom with 100-inch display |

**Supplementary Table 4:** Parameters for simulated living scenarios.

| Scenario | Height | Area | Configuration | | |
| --- | --- | --- | --- | --- | --- |
|  | 2.8m |  | Low | Medium | High |
| Residence |  | 100 m2 | 1 TV and 2 phones | 1 TV, 2 phones, 1 laptop, 1 monitor and 1tablet | 2 TV, 3 phones, 2 laptops, 2 monitors and 2 tablets |
| Office |  | 50 m2 | 5 computers, 5 monitors and 5 phones | 10 computers, 15 monitors and 10 phones | 44 monitors, 22 phones and 65-inch LCD |
| School |  | 55-90 m2 | 65 m2 classroom with 55-inch display | 55 m2 classroom with 75-inch display | 90 m2 classroom with 100-inch display |

**Supplementary Table 5:** HQ in different life scenarios.

| Low-concentration scenario | | | | | | | | |
| --- | --- | --- | --- | --- | --- | --- | --- | --- |
| Office | | | School | | | Residence | | |
| Time (h) | Adult | Children | Time (h) | Adult | Children | Time (h) | Adult | Children |
| 1 | 0.56 | 7.21 | 1 | 0.31 | 3.99 | 1 | 0.26 | 3.37 |
| 2 | 0.28 | 3.61 | 2 | 0.15 | 2.00 | 2 | 0.13 | 1.68 |
| 3 | 0.19 | 2.40 | 3 | 0.10 | 1.33 | 3 | 0.09 | 1.12 |
| 4 | 0.14 | 1.80 | 4 | 0.08 | 1.00 | 4 | 0.06 | 0.84 |
| 5 | 0.11 | 1.44 | 5 | 0.06 | 0.80 | 5 | 0.05 | 0.67 |
| 6 | 0.09 | 1.20 | 6 | 0.05 | 0.67 | 6 | 0.04 | 0.56 |
| 7 | 0.08 | 1.03 | 7 | 0.04 | 0.57 | 7 | 0.04 | 0.48 |
| 8 | 0.07 | 0.90 | 8 | 0.04 | 0.50 | 8 | 0.03 | 0.42 |
| 9 | 0.06 | 0.80 | 9 | 0.03 | 0.44 | 9 | 0.03 | 0.37 |
| 10 | 0.06 | 0.72 | 10 | 0.03 | 0.40 | 10 | 0.03 | 0.34 |
| 12 | 0.05 | 0.60 | 12 | 0.03 | 0.33 | 12 | 0.02 | 0.28 |
| 24 | 0.02 | 0.30 | 24 | 0.01 | 0.17 | 24 | 0.01 | 0.14 |
| Medium-concentration scenario | | | | | | | | |
| Office | | | School | | | Residence | | |
| Time (h) | Adult | Children | Time (h) | Adult | Children | Time (h) | Adult | Children |
| 1 | 1.49 | 19.31 | 1 | 0.68 | 8.82 | 1 | 0.32 | 4.14 |
| 2 | 0.75 | 9.66 | 2 | 0.34 | 4.41 | 2 | 0.16 | 2.07 |
| 3 | 0.50 | 6.44 | 3 | 0.23 | 2.94 | 3 | 0.11 | 1.38 |
| 4 | 0.37 | 4.83 | 4 | 0.17 | 2.20 | 4 | 0.08 | 1.03 |
| 5 | 0.30 | 3.86 | 5 | 0.14 | 1.76 | 5 | 0.06 | 0.83 |
| 6 | 0.25 | 3.22 | 6 | 0.11 | 1.47 | 6 | 0.05 | 0.69 |
| 7 | 0.21 | 2.76 | 7 | 0.10 | 1.26 | 7 | 0.05 | 0.59 |
| 8 | 0.19 | 2.41 | 8 | 0.09 | 1.10 | 8 | 0.04 | 0.52 |
| 9 | 0.17 | 2.15 | 9 | 0.08 | 0.98 | 9 | 0.04 | 0.46 |
| 10 | 0.15 | 1.93 | 10 | 0.07 | 0.88 | 10 | 0.03 | 0.41 |
| 12 | 0.12 | 1.61 | 12 | 0.06 | 0.73 | 12 | 0.03 | 0.34 |
| 24 | 0.06 | 0.80 | 24 | 0.03 | 0.37 | 24 | 0.01 | 0.17 |
| High-concentration scenario | | | | | | | | |
| Office | | | School | | | Residence | | |
| Time (h) | Adult | Children | Time (h) | Adult | Children | Time (h) | Adult | Children |
| 1 | 3.93 | 50.87 | 1 | 0.73 | 9.41 | 1 | 0.64 | 8.24 |
| 2 | 1.96 | 25.44 | 2 | 0.36 | 4.71 | 2 | 0.32 | 4.12 |
| 3 | 1.31 | 16.96 | 3 | 0.24 | 3.14 | 3 | 0.21 | 2.75 |
| 4 | 0.98 | 12.72 | 4 | 0.18 | 2.35 | 4 | 0.16 | 2.06 |
| 5 | 0.79 | 10.17 | 5 | 0.15 | 1.88 | 5 | 0.13 | 1.65 |
| 6 | 0.65 | 8.48 | 6 | 0.12 | 1.57 | 6 | 0.11 | 1.37 |
| 7 | 0.56 | 7.27 | 7 | 0.10 | 1.34 | 7 | 0.09 | 1.18 |
| 8 | 0.49 | 6.36 | 8 | 0.09 | 1.18 | 8 | 0.08 | 1.03 |
| 9 | 0.44 | 5.65 | 9 | 0.08 | 1.05 | 9 | 0.07 | 0.92 |
| 10 | 0.39 | 5.09 | 10 | 0.07 | 0.94 | 10 | 0.06 | 0.82 |
| 12 | 0.33 | 4.24 | 12 | 0.06 | 0.78 | 12 | 0.05 | 0.69 |
| 24 | 0.16 | 2.12 | 24 | 0.03 | 0.39 | 24 | 0.03 | 0.34 |

**Supplementary Table 6:** RfD values for LCM determined using the benchmark dose approach.

| Effect | Model | BMDL  (mg/kg) | RfD  (ng/kg/day) | Detailed illustration |
| --- | --- | --- | --- | --- |
| Male: weight loss | Polynomial 2 | 0.243 | 81 | Supplementary Fig.1a |
| Male: sperm count decrease | Exponential 5 | 0.021 | 7 | Supplementary Fig.2b |
| Male: testosterone decrease | Power | 0.013 | 4 | Supplementary Fig.1a |
| Male: epididymal tubule wall thickness decrease | Exponential 5 | 0.031 | 10 | Supplementary Fig.4e |
| Female: weight loss | Polynomial 2 | 0.177 | 59 | Supplementary Fig.1b |
| Female: endometrial thickness decrease | Power | 0.024 | 8 | Supplementary Fig.5c |
| Female: estrogen decrease | Exponential 5 | 0.01 | 3 | Supplementary Fig.1b |
| Female: follicle count decrease | Power | 0.021 | 7 | Supplementary Fig.5b |

**Supplementary Note 1:** Determination the critical indicators of environmental and health risks.

Through animal experiments, we identified critical endpoint within the environmental health risk assessment framework, including the dose–response relationship of reproductive toxicity (Supplementary Fig.1-6). We thereafter used the benchmark dose (BMDL) to calculatethe critical environmental health indicators, the reference dose (RfD), which is an estimated of the daily exposure to a chemical that is likely to be without an appreciable risk of harmful effects over a lifetime. The most sensitive RfD of 3 ng/kg/day was used in this study to ensure protection of human populations. Additional RfD details are provided in Supplementary Table 6.

The dose–response relationship of reproductive toxicity was obtained through mouse experiments. Oral exposure to LCM for 28 days at doses of 0, 0.03, 0.3, and 3 mg/kg/day induced significant reproductive toxicity in mice. At the highest dose, both male and female exhibited substantial weight loss (32.6% and 27.2%, respectively). Hormonal disruption was evident: males showed decreased serum testosterone and lowered LH and FSH, while females displayed dose-dependent reductions in E2, LH, and FSH levels (Supplementary Fig.1). In males, LCM severely compromised sperm parameters. Sperm count and quality were significantly impaired, characterized by an increase in immotile sperm, reduced kinematic parameters (curvilinear velocity (VCL) and straight-line velocity (VSL)), decreased amplitude of lateral head displacement (ALH), lower linearity (LIN), and a higher incidence of abnormal morphologies, including small heads, neck folds, and absent tails (Supplementary Fig.2).

Histopathological examination revealed abnormalities in testes (multinucleated giant cells, germ cell shedding) and epididymis (epithelial vacuolation, germ cell sloughing, reduced duct wall thickness) (Supplementary Fig.3-4). Female reproductive organs were similarly affected. Ovarian follicle counts (primary, secondary, antral, mature) and corpora lutea declined dose-dependently (Supplementary Fig.5(a-b)). Uterine damage included uneven endometrial thickness, epithelial damage, and significant reductions in average endometrial thickness and gland number (Supplementary Fig.5(c-e)).

Parental LCM exposure caused dose-dependent reductions in offspring number, increased maternal infertility, and elevated offspring mortality, with a projected population extinction probability of 40.04% at the lowest dose. Offspring exhibited disrupted sex hormone levels (decreased male testosterone, female estradiol) and gonadotropin imbalance demonstrates its intergenerational effects on reproduction (Supplementary Fig.6).


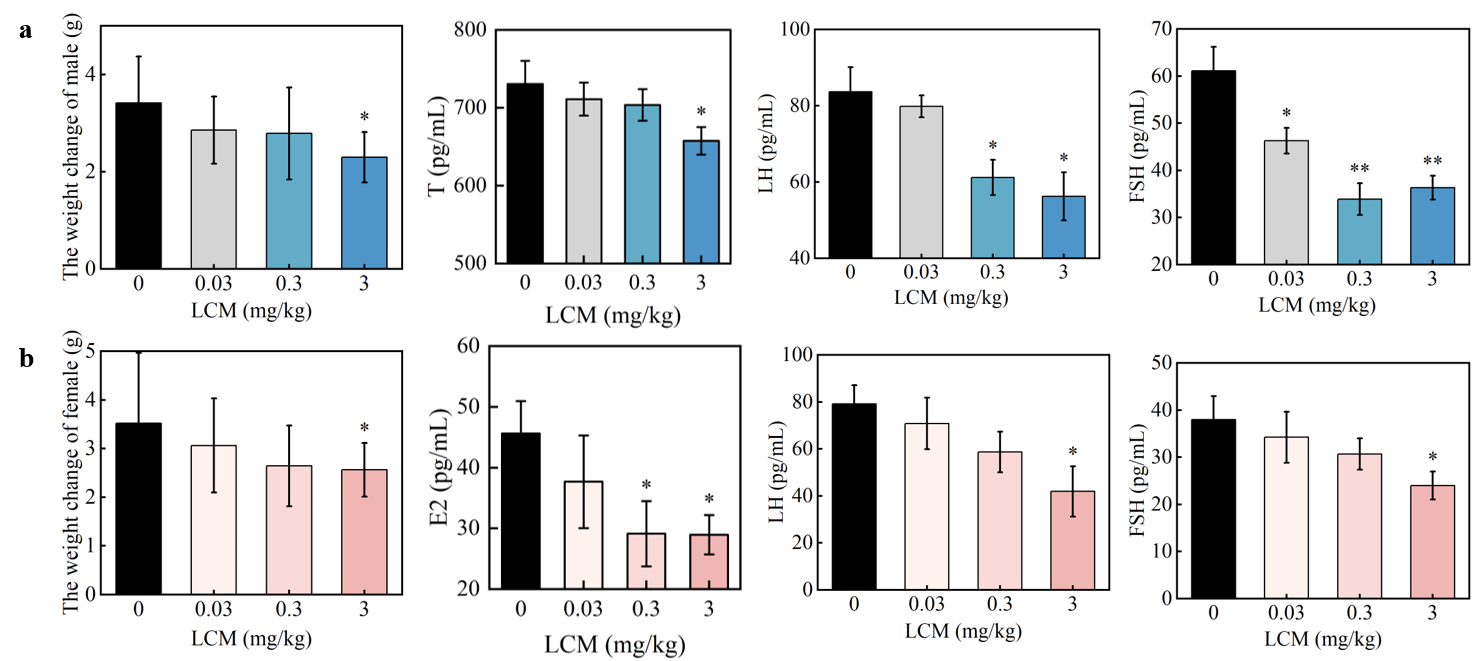


**Supplementary Fig.1:** Effects of LCM on body weight and hormone levels. C57BL/6J mice were treated with vehicle or LCM for 28 days. (a) Body weight and serum gonadal hormone Testosterone (T), Luteinizing Hormone (LH), and Follicle-Stimulating Hormone (FSH) in male mice (body weight: n=7 per group; T: n=4 per group; LH and FSH: n=3 per group). (b) Body weight and serum gonadal hormone Estradiol (E2), LH and FSH in female mice (body weight: n=7 per group; E2: n=4 per group; LH and FSH: n=3 per group). Data are presented as mean ± S.D., **p* < 0.05, ***p* < 0.01.


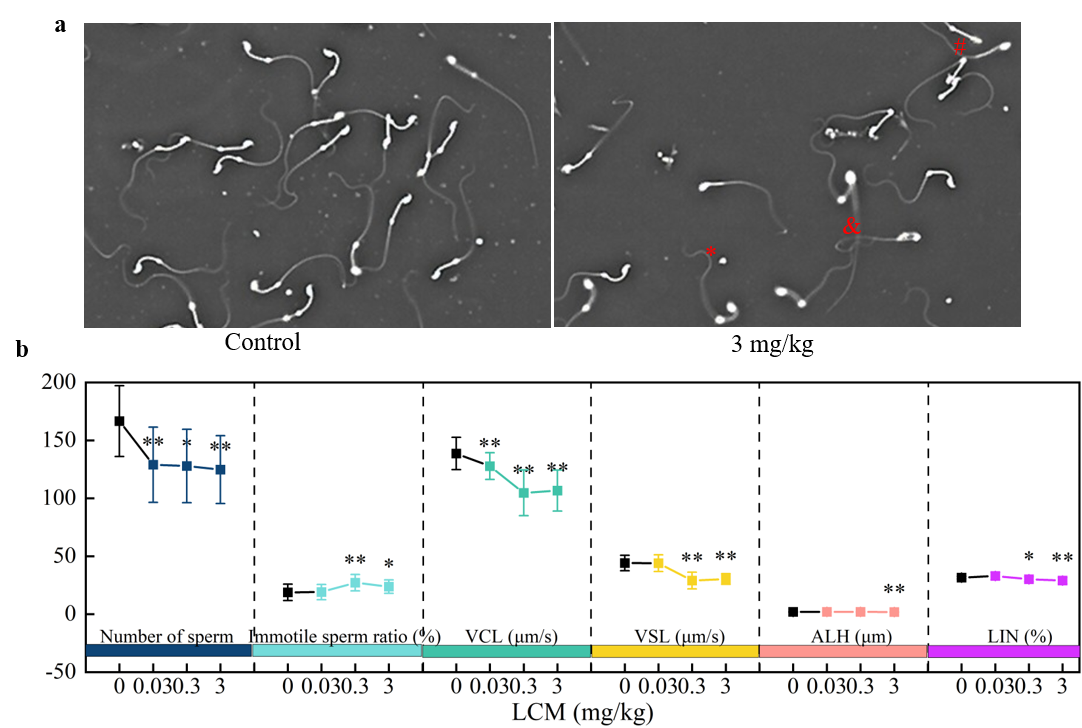


**Supplementary Fig.2:** Effects of LCM on sperm. Male mice were treated with vehicle or LCM for 28 days. (a) Sperm abnormal morphology: * tailless sperm; & neck folding; # small head. (Sperm images were magnified 63×.) (b)Sperm quality and quantity metrics: Kinematic parameters: VCL (curvilinear velocity), VSL (straight-line velocity), ALH (amplitude of lateral head displacement), LIN (linearity) (n=6 per group). Data are presented as mean ± S.D., **p* < 0.05, ***p* < 0.01.


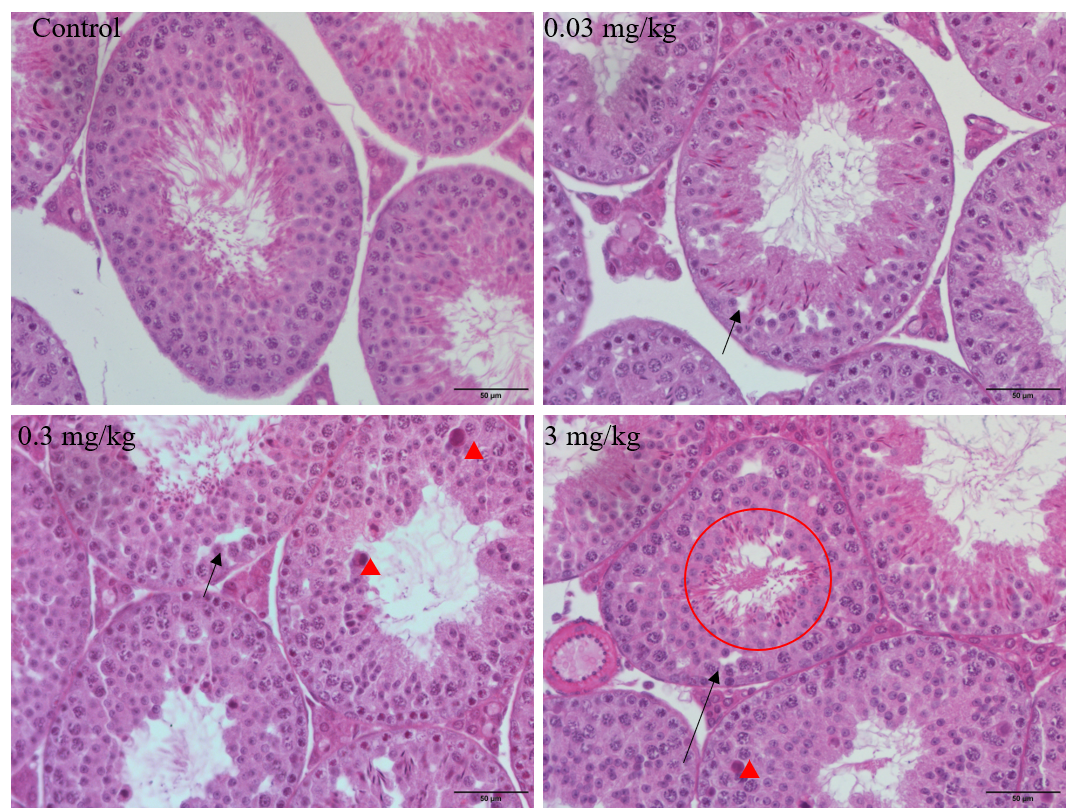


**Supplementary Fig.3:** LCM induces histopathological alterations and structural damage in testicular tissue. Male mice were treated with vehicle or LCM for 28 days. Histological analysis of testicular tissues (H&E staining) showing structural abnormalities. Black arrows indicate vacuolization; red triangles mark megakaryocytes; red circles highlight displaced immature germ cells (n=3 per group. Scale bars: 50 μm.


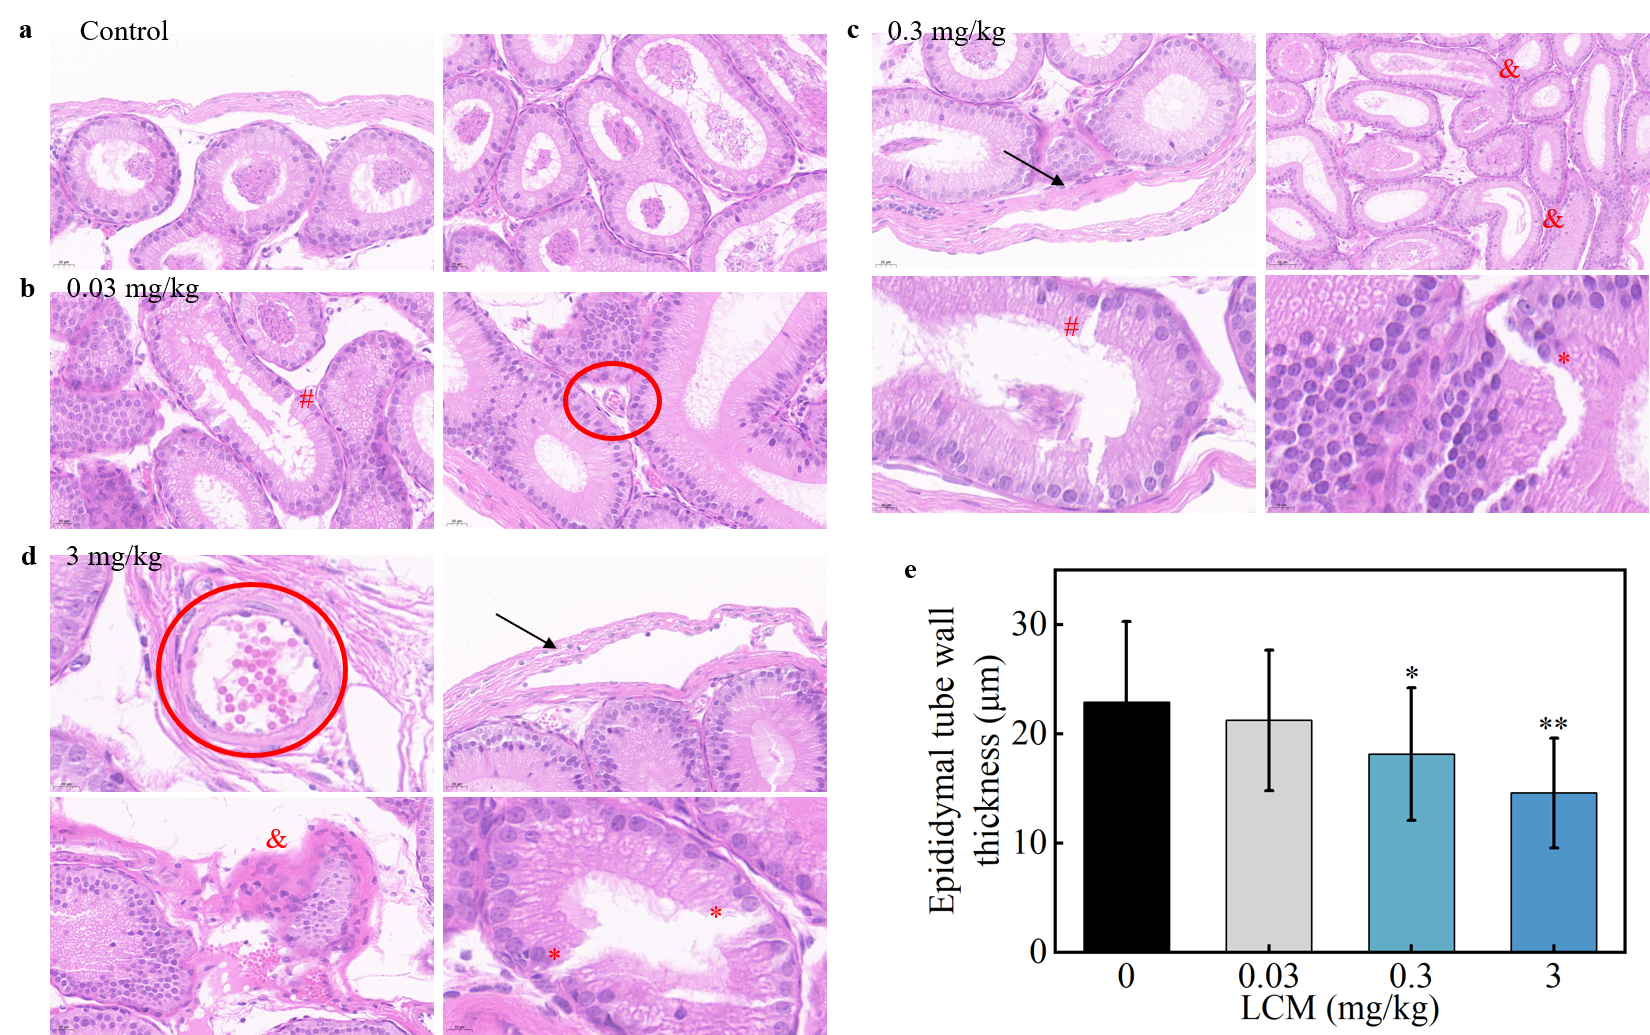


**Supplementary Fig.4:** LCM induces pathological changes in the epididymis of male mice. Male were treated with vehicle or LCM for 28 days. Representative H&E-stained sections of epididymal tissue are shown. (a) Control group showing normal histological architecture (n=3 per group). (b-d) LCM-treated groups exhibiting dose-dependent pathological alterations (n=3 per group): (b) 0.03 mg/kg, (c) 0.3 mg/kg, and (d) 3 mg/kg. Key observations include: epithelial cell vacuolization (#); shedding of germ cells (red circle); vacuolization of the epididymal tubule wall (black arrow); irregular arrangement of epithelial cells (&); and shedding of epithelial cells (*). (e) Epididymal tubule wall thickness (n=3 per group). Data are presented as mean ± S.D., **p* < 0.05, ***p* < 0.01. Scale bars: 20 μm (a-d).


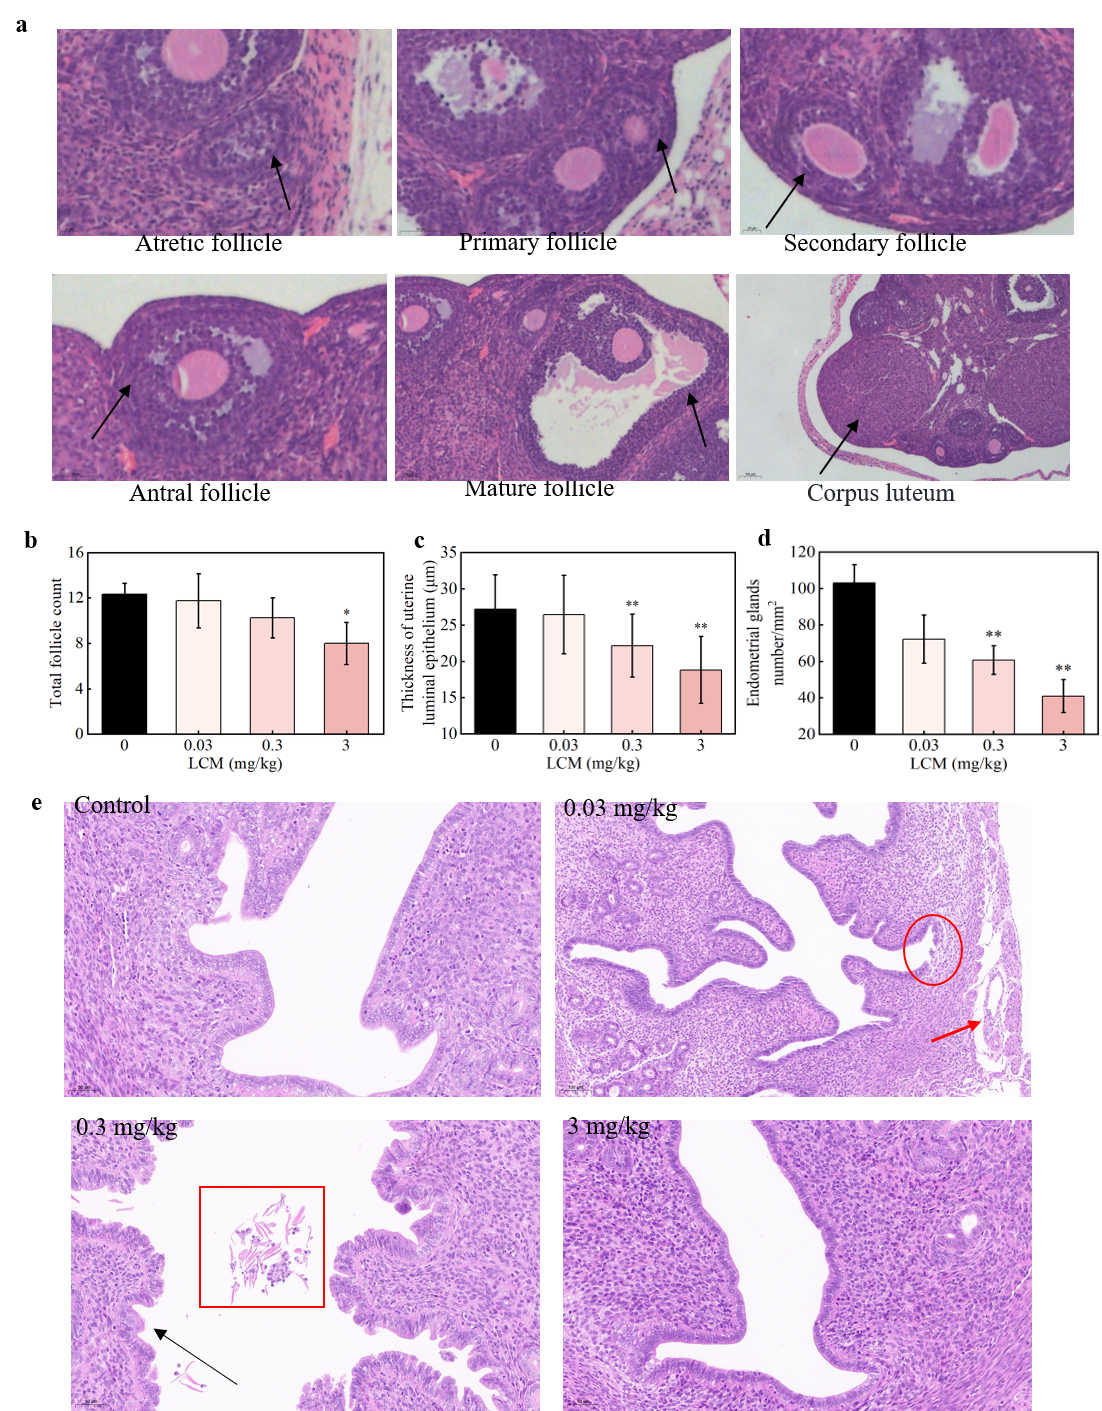


**Supplementary Fig.5:** Effects of LCM on ovarian follicle development and uterine structure in female. Female were treated with vehicle or LCM for 28 days. (a) Representative histology diagram of ovarian sections illustrating the stages of follicular development. The impact of LCM on the population of primordial, primary, secondary, and antral follicles is demonstrated (n=4 per group). (b) Follicle count changes in ovarian tissue (n=4 per group). (c) Endometrial thickness variations (n=3 per group). (d) Quantitative analysis of the number of endometrial glands in uterine tissues (n=3 per group). (e) Uterine tissue damage: red circle (damaged epithelium); red arrow (vacuolation in uterine wall); black arrow (uneven endometrial thickness); red square (shed tissues in the uterine cavity); the 3 mg/kg LCM group shows narrowed uterine cavity and reduced endometrial thickness (n=3 per group). Data are presented as mean ± S.D., **p* < 0.05, ***p* < 0.01. Scale bars: 50 μm (a, e).


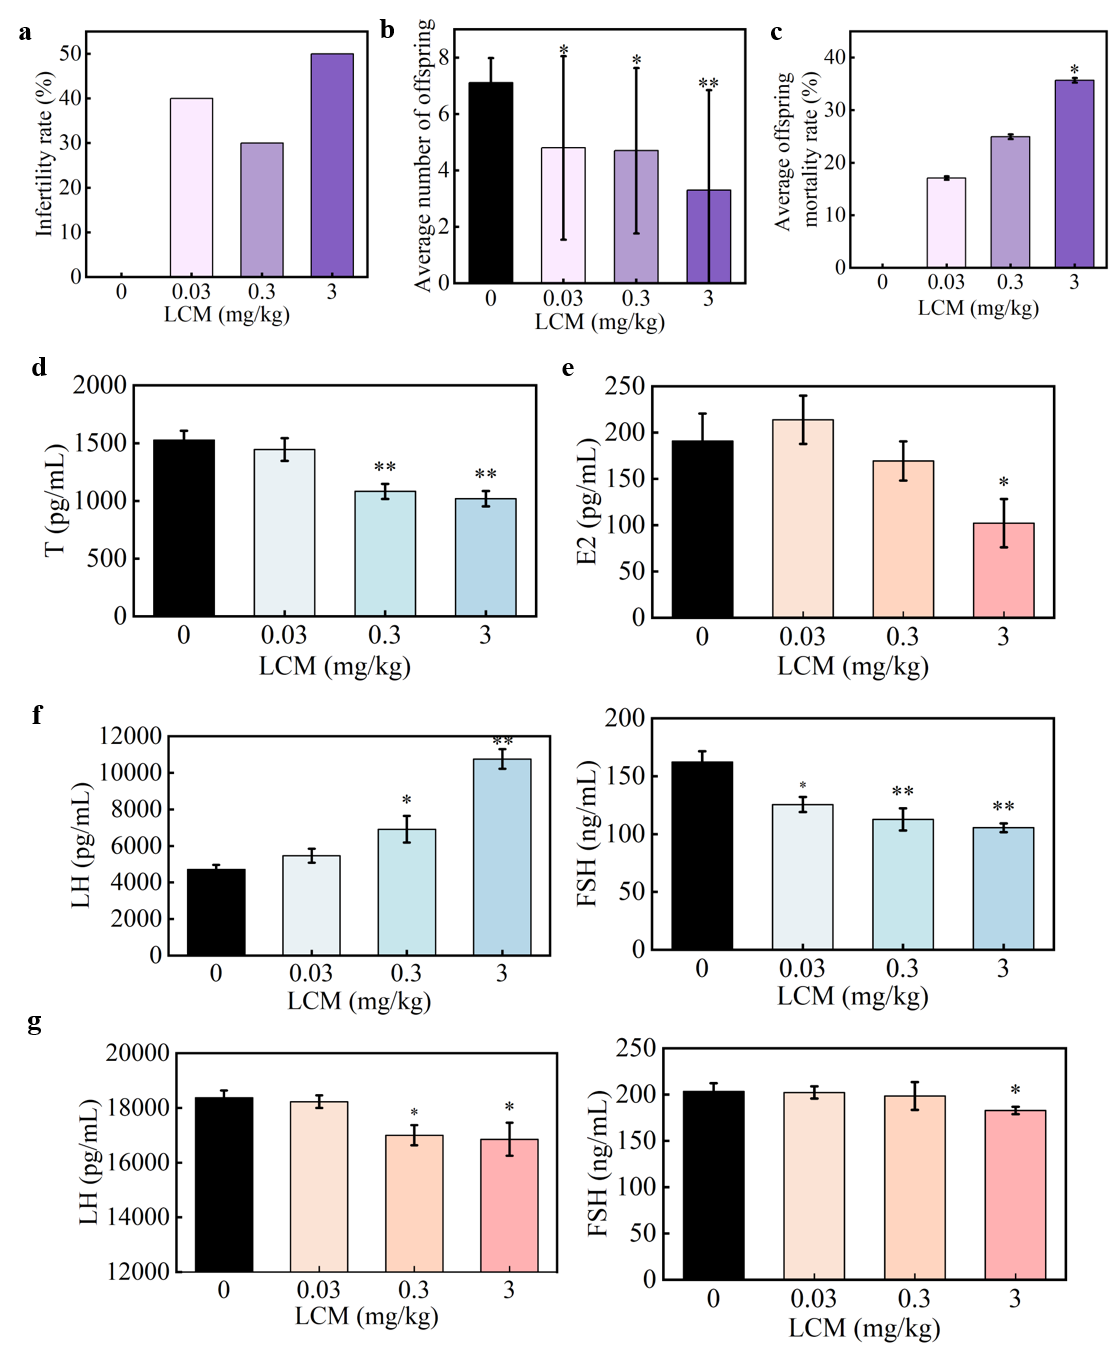


**Supplementary Fig.6:** Transgenerational effects of parental generation LCM exposure on reproductive outcomes and offspring health in mice. Pregnant mice were continuously exposed to LCM, and offspring were further exposed *via* breastfeeding for 21 days after birth. (a) Infertility rate of LCM-exposed parental generation (n=10 per group). (b) Number of offspring per dam (n=10 per group). (c) Mortality rate of offspring (n=10 per group). (d) Testosterone level changes in male offspring (n=3 per group). (e) Estrogen level changes in female offspring (n=3 per group). (f) Serum gonadotropin levels (LH, FSH) in male offspring (n=3 per group). (g) Serum gonadotropin levels in female offspring (n=3 per group). Data are presented as mean ± S.D., **p* < 0.05, ***p* < 0.01.

**Supplementary Note 2:** Supplementary methods.

The details of determining reproductive experimental indicators are presented here. The chemical used for exposure is: trans-1-ethoxy-2,3-difluoro-4-(4-propyl-cyclohexyl)-benzene (2O3cHdFP, CAS: 174350-05-1) was >98% pure and purchased from J&K Chemical Ltd. (Shanghai, China). All experimental animals were specific pathogen-free (SPF) C57BL/6J mice (6 weeks old) purchased from Sipeifu (Beijing) Biotechnology Co., Ltd. Mice were housed in SPF facilities at the Chinese Center for Disease Control and Prevention under controlled conditions (22 ± 2 °C, 50–60% humidity, 12h/12h light/dark cycle) with free access to water and feed. Animals were randomly assigned to four groups (vehicle control, 0.03, 0.3, or 3 mg kg-1 bw d-1 LCM), each comprising 20 females and 10 males, and housed five per cage. Following a 1-week acclimatization period, mice received daily oral gavage of LCM dissolved in corn oil at the appropriate concentration. Dosing volume (5 mL kg-1 bw) was adjusted daily based on body weight. After 14 days, males and females were paired at a 1:1 ratio, while 10 females per group remained unmated. After mating 14 days, 10 males, 10 unmated females, and non-pregnant females per group were euthanized. Pregnant females continued dosing until postpartum day 21, after which dams and pups were weighed and euthanized. Serum was collected for sex hormone measurement, and organs were harvested for biochemical analysis and histopathological examination. Multiple reproductive parameters were evaluated:

Sex hormone analysis. The blood sample placed at room temperature for 2 hours, then at 4 ℃ 3000 rpm centrifuged for 15 minutes, the supernatant was evaluated for sex hormone levels of estradiol (E2), luteinizing hormone (LH), follicle stimulating hormone (FSH) and testosterone (T) by ELISA (Uscn Life Science Inc., China) according to manufacturer's instructions.

Observation of histopathology. The paraffin embedded testis, epididymis, ovaries and uterus tissues were sectioned at 5 μm (n=5). The slices were immersed in xylene for 20 min, and treated with gradient ethanol from100 % to 30 % for 3 min respectively. Next, the slices were stained by hematoxylin and eosin to observe the structure changes of tissues.

Determination of sperm quality and quantity. Sperm were released from the left caudal epididymis of male mice set in 6 parallels. Epididymal spermatozoa from each mouse were incubated in 1 mL of human tubal fluid (HTF) at 37°C for 20 min. Sperm quantity, immobility ratio, curvilinear velocity (VCL), straight-line velocity (VSL), linearity (LIN), and amplitude of lateral head displacement (ALH) were detected using computer-aided sperm analysis (CASA) system (SAS-AM-II, Beijing Sais Medical Technology Co., Ltd., China).

Calculation of Mouse Population Extinction Probability.In population dynamics, the extinction probability of a population, group, or family is primarily derived using the Galton-Watson branching process. Many mammals live in groups with social structures, where the smallest unit within these groups is a lineage (or family) of kin-related individuals. 8, 9, 10, 11 The fundamental tool for analyzing the Galton-Watson process is the probability generating function (pgf). Assume that the initial ancestor and all subsequent descendants produce offspring with probability , where is a non-negative integer. The pgf is a function , where is a real number between 0 and 1. The function is defined as the sun of each probability times to the power : 12

|  |  | (1) |
| --- | --- | --- |

The usefulness of pgf for Galton-Watson process derives from the property that the pgf for the number of descendants in each successive generation is obtained by iterating the original pgf. This implies that the first-generation pgf is , the second-generation pgf is , permitting the algebra to extend to infinity. The fundamental proposition of Galton-Watson processes is: if is the probability that the process will eventually become extinct, then it must satisfy the following equation: 12

|  |  | (2) |
| --- | --- | --- |

Therefore, based on the pregnancy status and offspring number per dam in the control group and environmental dose group (0.03 mg/kg), we calculated the population extinction probability.

**Supplementary References**

1. Liu Y. & Kannan K. Concentrations, Profiles, and Potential Sources of Liquid Crystal Monomers in Residential Indoor Dust from the United States. *Environ. Sci. Technol.* **58**, 12400-12408 (2024).

2. Liu Y., Li W.L., Li Z.M. & Kannan K. A method for the determination of 60 liquid crystal monomers in biotic and abiotic samples. *Environ. Chem. Ecotoxicol.* **6**, 51-64 (2024).

3. Li H., Lyu B., Li J. & Shi Z. Liquid crystal monomers (LCMs) in indoor residential dust from Beijing, China: occurrence and human exposure. *Espr.* **31**, 29859-29869 (2024).

4. Yang R., Wang X., Niu Y., Chen X. & Shao B. Fluorinated liquid-crystal monomers in paired breast milk and indoor dust: A pilot prospective study. *Environ. Int.* **176**, (2023).

5. Zhang S.*, et al.* Occurrence, Distribution, and Human Exposure of Emerging Liquid Crystal Monomers (LCMs) in Indoor and Outdoor Dust: A Nationwide Study. *Environ. Int.* **164**, (2022).

6. Cheng Z.*, et al.* Electronic-Waste-Driven Pollution of Liquid Crystal Monomers: Environmental Occurrence and Human Exposure in Recycling Industrial Parks. *Environ. Sci. Technol.* **56**, 2248-2257 (2022).

7. Zhu M.*, et al.* Identification of Environmental Liquid-Crystal Monomers: A Class of New Persistent Organic Pollutants-Fluorinated Biphenyls and Analogues-Emitted from E-Waste Dismantling. *Environ. Sci. Technol.* **55**, 5984-5992 (2021).

8. Caron-Lormier G., Masson J.P., Ménard N. & Pierre J.S. A branching process, its application in biology: Influence of demographic parameters on the social structure in mammal groups. *J Theor. Biol.* **238**, 564-574 (2006).

9. Kajunguri D., Are E.B. & Hargrove J.W. Improved estimates for extinction probabilities and times to extinction for populations of tsetse (Glossina spp). *Plos Neglect. Trop. D.* **13**, (2019).

10. Molina M., Mota M. & Ramos A. Mathematical modeling in biological populations through branching processes. Application to salmonid populations. *J. Math. Biol.* **70**, 197-212 (2015).

11. Athreya K.B. & Ney P.E. T. E. Harris and branching processes. *Ann. Probab.* **39**, 429-434 (2011).

12. Taneyhill D.E., Dunn A.M. & Hatcher M.J. The Galton–Watson Branching Process as a Quantitative Tool in Parasitology. *Parasitology Today* **15**, 159-165 (1999).
